# Supplementary material for: Heat stress induces ferroptosis-like cell death in plants
Source: PubMed Central journal article supplement — J Cell Biol. 2017 Feb;216(2):463–76. doi: 10.1083/jcb.201605110 (PMC5294777; doi:10.1083/jcb.201605110), 2017-02
Supplement: JCB_201605110_sm.pdf [file JCB_201605110_sm.pdf]

Distéfano et al., <https://doi.org/10.1083/jcb.201605110>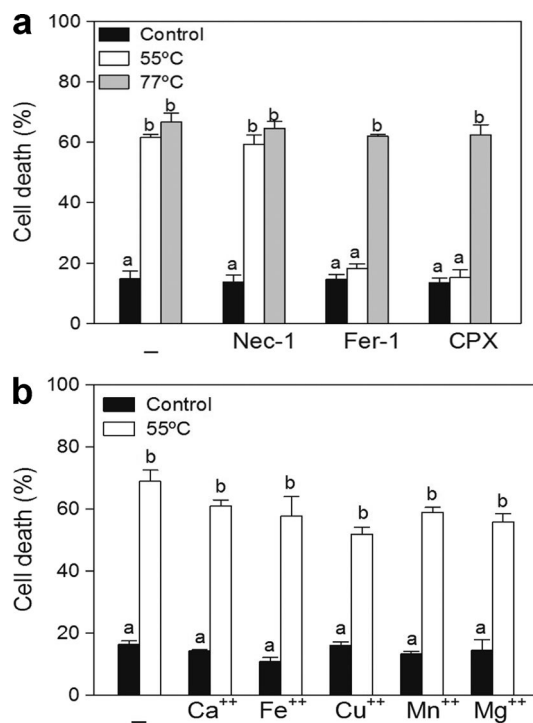

Figure S1. **Effect of the necroptosis inhibitor Nec-1 and divalent transition metal ions on cell death induced by a 55°C HS treatment.** (a) Effect of Nec-1 on cell death triggered by 55°C or a 77°C HS treatment. 6-d-old seedlings were preincubated overnight (16 h) with 20  $\mu$ M Nec-1, 1  $\mu$ M Fer-1, or 10  $\mu$ M CPX. (b) 6-d-old seedlings were preincubated overnight (16 h) with different divalent transition metal ions as indicated. (a and b) Cell death was induced by treatment at 55°C for 10 min. Root hairs were stained with Sytox green, and dead root hairs were quantified. Results are expressed as a percentage of dead cells. Data are the mean  $\pm$  SEM of three independent experiments. Different letters denote statistical difference (one-way analysis of variance,  $P < 0.05$ ).

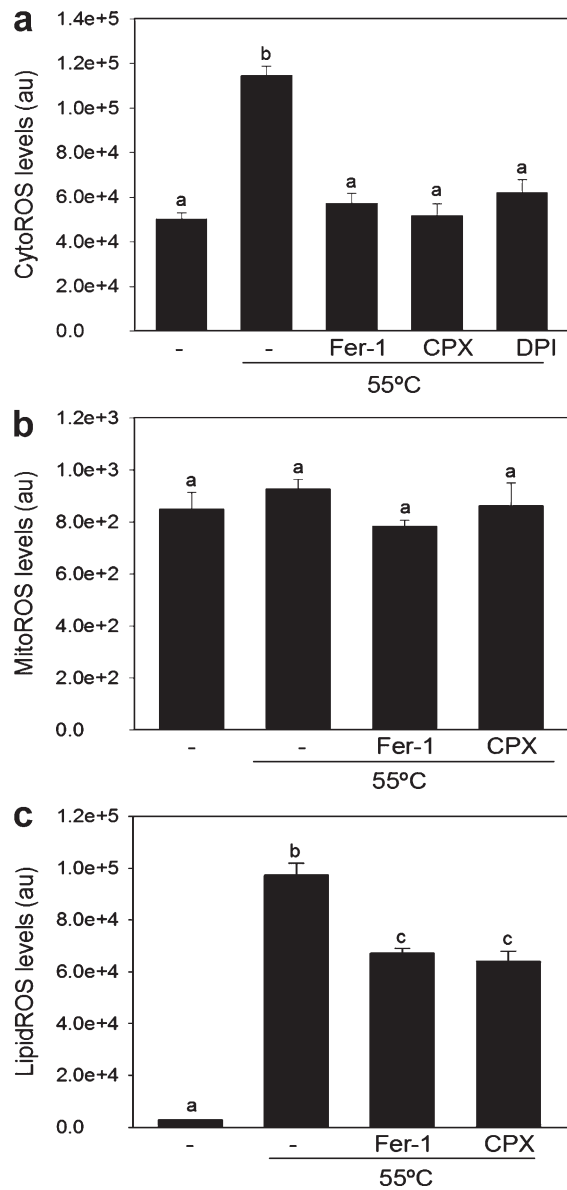

Figure S2. **55°C HS in *Arabidopsis* cell suspensions triggers the accumulation of ROS, which can be inhibited by Fer-1, CPX, and DPI.** 7-d-old cultures were pretreated overnight (16 h) with 1  $\mu$ M Fer-1, 10  $\mu$ M CPX, or 10  $\mu$ M DPI as indicated and treated at the specified temperature. (a) Cytosolic ROS (CytoROS) levels were detected with the H2DCFDA probe 3 h after a 55°C treatment. (b) Mitochondrial ROS (MitoROS) levels were detected with the mitoSOX probe 3 h after a 55°C treatment. (a and b) Data are the mean  $\pm$  SEM of three independent experiments. Different letters denote statistical difference (one-way analysis of variance,  $P < 0.05$ ). (c) Lipid ROS levels were detected with the C11-BODIPY probe 3 h after 55°C treatment. Data are the mean  $\pm$  SEM of three independent experiments. No significant differences were found (one-way analysis of variance).

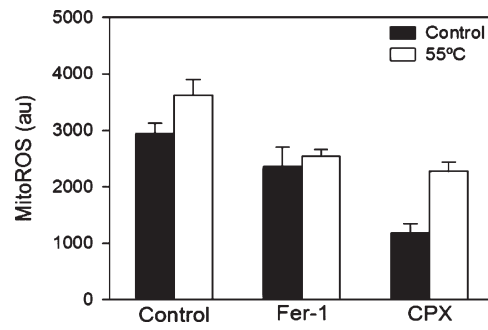

Figure S3. **MitoSOX is not involved in the cell death triggered by 55°C treatment in *Arabidopsis* root hairs.** Mitochondrial ROS (MitoROS) levels were detected with the mitoSOX probe 3 h after 55°C treatment. Data are the mean  $\pm$  SEM of three independent experiments.

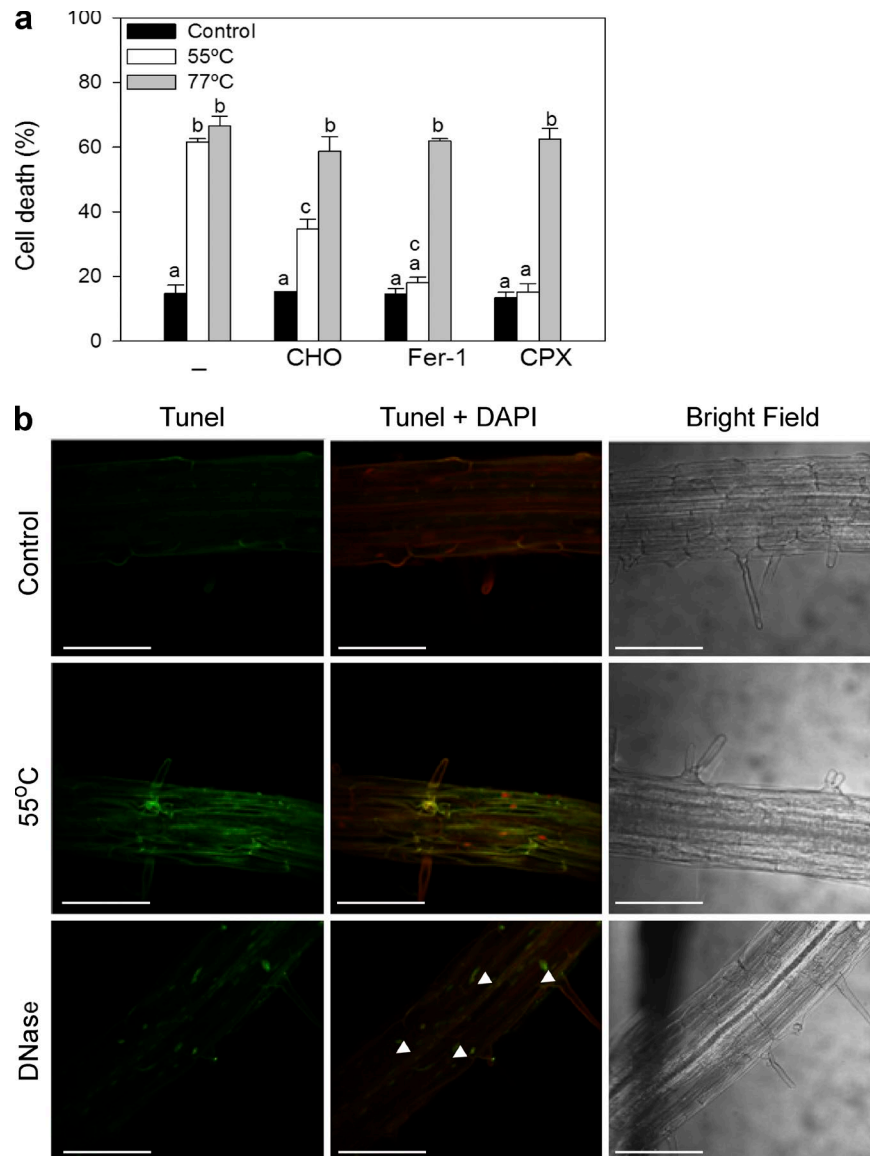

Figure S4. **A caspase-like activity is required for cell death after a 55°C HS, but DNA fragmentation is not detected.** (a) Effect of the caspase-3 inhibitor CHO on rates of HS-induced cell death in *Arabidopsis* root hairs. 6-d-old seedlings were preincubated in a 1  $\mu$ M CHO solution or with 1  $\mu$ M Fer-1 or 10  $\mu$ M CPX for 16 h before HS at 55°C or 77°C. Root hairs were stained with Sytox green, and dead root hairs were quantified. Results are expressed as a percentage of dead cells. Data are the mean  $\pm$  SEM of three independent experiments. Different letters denote statistical difference (one-way analysis of variance,  $P < 0.05$ ). (b) TUNEL labeling of *Arabidopsis* roots showed no TUNEL-positive nuclei in roots submitted to 55°C HS. Arrowheads indicate positive TUNEL nuclei. Bars, 100  $\mu$ m.

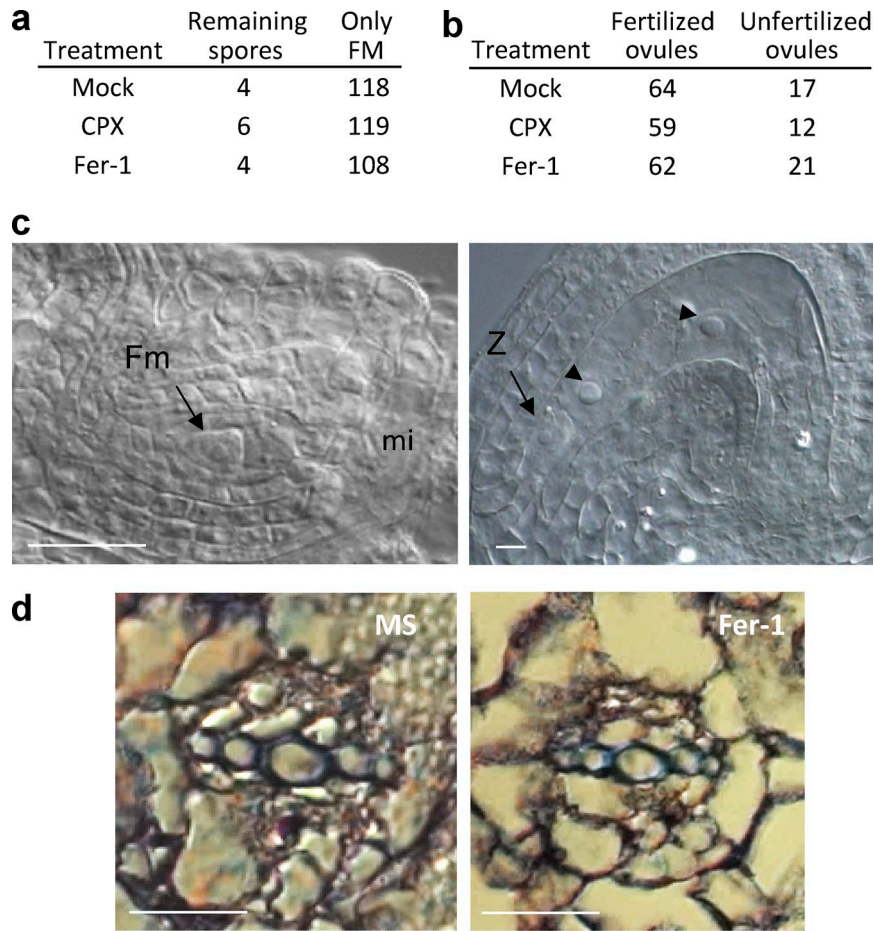

Figure S5. **Effect of ferroptosis inhibitors on reproductive and vascular development in *A. thaliana*.** (a) Megaspore cell death was analyzed in pistils from *Arabidopsis* inflorescences that were treated with either 10  $\mu\text{M}$  CPX or 1  $\mu\text{M}$  Fer-1 (in 0.1% DMSO and 0.01% Silwet L-77) or a mock solution (0.1% DMSO and 0.01% Silwet L-77). (b) Fertilization as a sign of normal synergid cell death was analyzed in pistils from *Arabidopsis* inflorescences that were treated with either 10  $\mu\text{M}$  CPX or 1  $\mu\text{M}$  Fer-1 (in 0.1% DMSO and 0.01% Silwet L-77) or a mock solution (0.1% DMSO and 0.01% Silwet L-77) that showed signs of pollination (pollen on the stigma) 3 d after treatment. (c) DIC images of a developing ovule showing a functional megaspore (Fm; left) and a fertilized embryo sac showing a zygote (Z) and endosperm nuclei (arrowheads). Mi, micropyle. Bars, 25  $\mu\text{m}$ . (d) The effect of ferroptosis inhibitors on xylem anatomy was analyzed in hypocotyls of 6-d-old plants that were grown in Murashige and Skoog medium or alone or with 1  $\mu\text{M}$  Fer-1. 50 plants were used for observations in each case. No differences were observed. Bars, 50  $\mu\text{m}$ .

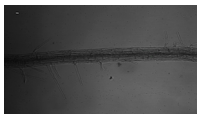

Video 1. **Sytox green staining of the different cell types that compose the root right after a 55°C HS treatment (T0).** The video is derived from a stack of serial confocal z sections taken through the root of a 6-d-old seedling stained with SYTOX green after a 55°C HS (4- $\mu\text{m}$  step size). This video supplements Fig. 2 b.

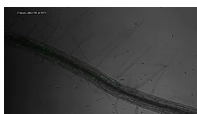

Video 2. **Sytox green staining of the different cell types that compose the root 2 h after a 55°C HS treatment.** The video is derived from a stack of serial confocal z sections taken through the root of a 6-d-old seedling stained with SYTOX green 2 h after a 55°C HS (4- $\mu\text{m}$  step size). This video supplements Fig. 2 b.

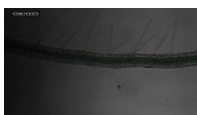

Video 3. **Sytox green staining of the different cell types that compose the root 4 h after a 55°C HS treatment.** The video is derived from a stack of serial confocal z sections taken through the root of a 6-d-old seedling stained with SYTOX green 4 h after a 55°C HS (4- $\mu\text{m}$  step size). This video supplements Fig. 2 b.

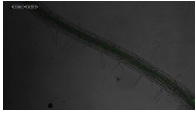

Video 4. **Sytox green staining of the different cell types that compose the root 6 h after a 55°C HS treatment.** The video is derived from a stack of serial confocal z sections taken through the root of a 6-d-old seedling stained with SYTOX green 6 h after a 55°C HS (4- $\mu$ m step size). This video supplements Fig. 2 b.

Table S1. **Identity of the transcriptional pharmacodynamic ferroptosis markers reported in Dixon et al. (2014) and putative orthologues found in *A. thaliana***

| Ferroptosis marker    | Description                                                                                                           | <i>Arabidopsis</i> blast hits (e value)                                                                                                                                                                                                              |
|-----------------------|-----------------------------------------------------------------------------------------------------------------------|------------------------------------------------------------------------------------------------------------------------------------------------------------------------------------------------------------------------------------------------------|
| ChAC1                 | Mammalian proapoptotic protein of unknown function induced during endoplasmic reticulum stress                        | AT4G31290 (7e-30), AT1G44790 (2e-36), AT5G26220 (8e-28)                                                                                                                                                                                              |
| DDit4                 | DNA damage-inducible transcript 4                                                                                     |                                                                                                                                                                                                                                                      |
| LOC284561             | Uncategorized gene affiliated with the lncRNA class                                                                   |                                                                                                                                                                                                                                                      |
| Asparagine synthetase | Encodes asparagine synthetase (EC 6.3.5.4)                                                                            | AT5G65010 (2e-115), AT3G47340 (2e-114), AT5G10240 (2e-114)                                                                                                                                                                                           |
| TSC22D3               | Encodes for a leucine zipper protein, functions as transcriptional regulator                                          |                                                                                                                                                                                                                                                      |
| DDIT3                 | DNA damage-inducible transcript 3                                                                                     |                                                                                                                                                                                                                                                      |
| JDP2                  | HUMAN isoform 2 of Jun dimerization protein 2                                                                         |                                                                                                                                                                                                                                                      |
| SESN2 gene            | Member of the sestrin family of PA26-related proteins                                                                 |                                                                                                                                                                                                                                                      |
| SLC1A4                | Solute carrier family 1 (glutamate/neutral amino acid transporter), member 4                                          |                                                                                                                                                                                                                                                      |
| PCK2                  | Phosphoenolpyruvate carboxykinase 2 (mitochondrial)                                                                   |                                                                                                                                                                                                                                                      |
| txnip                 | Encodes for a thioredoxin-interacting protein                                                                         |                                                                                                                                                                                                                                                      |
| VLDLR gene            | Encodes a lipoprotein receptor that is a member of the LDLR family                                                    |                                                                                                                                                                                                                                                      |
| GPT2 gene             | Alanine aminotransferase: catalyzes the reversible transamination between alanine and 2-oxoglutarate to form pyruvate | AT1G72330.1, mitochondrion, 6e-150; AT1G23310.1 apoplast, chloroplast, cytoplasm, membrane, peroxisome, vacuole, 3e-147; AT1G70580.4 chloroplast, chloroplast, stroma, cytoplasm, peroxisome, 3e-145; AT1G17290.1 chloroplast, mitochondrion, 2e-142 |

Table S2. List of primer pairs used for quantitative PCR

| Gene   | Forward, 5' to 3'         | Reverse, 5' to 3'            |
|--------|---------------------------|------------------------------|
| ASN1   | GGGATGCAAGCTGGTCCAACA     | TGACCCATCATCATCGGCATGT       |
| ASN2   | GCTGTAGAATGGGATGCAACTGGT  | TCCTCAATGCCTGTAGTGTGTCT      |
| ASN3   | ACGCAGCTTGGTCACAGAATCT    | CCTCAAACAATGGCTGGAGTCTTCT    |
| CCL1   | TCAGGGCCAAACAGAGACTA      | CGGTGGCATCAATGTCTAAC         |
| CCL2   | GGGCATGAGGAGGACTATGT      | GGCTTGCTCTTGATTCCCTC         |
| CCL3   | CCAGCTCCATTGGAAGAAAT      | TACTCTCGTTGTGCCACA           |
| GPT2a  | AGTTGTAGTCCCTGGTCTGGCT    | AGCTCTTGGAAGCTGTGCAGACG      |
| GPT2b  | TCCCTTGCCCTCACCTCCACA     | AGCCAGAACCAGGGACAACGA        |
| VDAC1  | GAACGACAAGGGGATCTAT       | TAACCTGTGGCTCAGTTCGG         |
| VDAC2  | GGCCCTTACGTCTACTCTC       | ACTTGTATTGGGTGGCAACA         |
| VDAC3  | GGCCCTGAAGTGGGTAGA        | AAGATTGTTTAGCAACCAGACA       |
| VDAC4  | ATCACAAGTCTGGCAAGCTG      | ACAGAGGAGTTGGGTTGAGG         |
| VDAC5  | GGGTATGACACCACATCTCG      | GGCTTTGATCGAATCTCCTT         |
| KOD    | TATGTGGTGGCTAGTTGGACTTACA | AGCTTTACTTAGAGATGACAGAGACGCT |
| BAX-1  | CCCTTGATCAAAGTGGCAAT      | GAAAGCAGTCCCTCAAAGGTAGAG     |
| HRD1   | GCTCAAGGAAGGTCAATGGG      | CAAGGGAAGGCCATAGTTCA         |
| SEL1   | GGAATATGCAGTCGAAGATGG     | CACCCGAGAATCCTTTGAGA         |
| PR2    | GCAATGCAGAACATCGAGAA      | TCATCCCTGAACCTTCCTTG         |
| PR5    | GCCGTGGAGCTAACGATAAG      | GCGTAGCTATAGGCGTCAGG         |
| WRKY33 | TGGAGAGAGCATCACACGAC      | GTGCTCTGTTTGTGGCGTAA         |
| LSD1   | TGTCAAACACTCGAACCTTGTC    | TTGATCTGCCAACCTGA            |
| ACS2   | GCTGGTTTATTTGCGTGGAT      | AGGAAGAGCCAGGAGACACA         |
| ATG7   | TGTTACACGCCCGGTCTAG       | GAGTTCAACGGCGAGAGCTC         |
| ATG8   | ATTGTCGAAAGAGCCGAGAA      | GATCCGCTCCGTACAACAT          |
| ATG9   | AGACCCTTGAGTGGACCTT       | AGCCCAACCACAATAGTCG          |
| VPE    | AAAGGTGGAAGCGGTAAGGT      | TATGTGAGGCGTATTTGGCA         |
| MC1    | CCGAGGAAGAACTGATCCA       | GTTTCTTTGACCGGAACCAT         |
| MC2    | CGTGGACGATGAGATCAATG      | TCCGAGCCTGTCCATTCTAC         |
| RHD6   | CCTAAATCCGCTGGAACAA       | TGTTGGCTTAGGCTTGGTCT         |
| WER    | GCTCCACAAGTTGCTTGTA       | TCACCATTGCTCTGTTGGT          |
| Bip1   | TGCCCTTGAGCATCATTGAA      | TCAGTCTGAGGAGATTAGTGCT       |
| Bip2   | TCTCCTCAGGACTGAAAACCT     | TCGACGTTAAGAGATTGATCG        |
| Bip3   | GGCTTCCCATCTTTGTTAC       | CGAAACGTCTGATTGGAAGAA        |
| Bzip60 | TCTCAAGCATTCTTTGAGAT      | CGATGATGCTGTGGCTAAAA         |
